# Supplementary material for: Fire needle plus cupping for acute herpes zoster: study protocol for a randomized controlled trial
Source: PubMed Central journal article supplement (PMC7409425; doi:10.1186/s13063-020-04599-2), 2020-08-06
Supplement: 13063_2020_4599_MOESM2_ESM.pdf [file 13063_2020_4599_MOESM2_ESM.pdf]

云南省科学技术厅-昆明医科大学应用基础研究联合专项资金 2017 年推荐立项项目公示  
 Yunnan provincial department of science and technology - kunming medical university applied  
 fundamental research joint special fund recommended for approval in 2017

2017 年云南省科学技术厅昆明医科大学应用基础研究联合专项资金推荐拟立项项目名单  
 Recommend the list of proposed projects of Yunnan provincial department of science and  
 technology - kunming medical university applied basic research joint special fund in2017

| 序号<br>serial number | 项目名称<br>project name                                                                                                                                                                                    | 申报人<br>declarant  | 所在单位<br>Relying on<br>universities                                                             | 资助经费（万元）<br>Funding amount<br>（RMB:<br>ten thousand） |
|---------------------|---------------------------------------------------------------------------------------------------------------------------------------------------------------------------------------------------------|-------------------|------------------------------------------------------------------------------------------------|------------------------------------------------------|
| .....               | .....                                                                                                                                                                                                   | .....             | .....                                                                                          | .....                                                |
| 2                   | 火针赞刺法<br>治疗急性期<br>带状疱疹的<br>疗效观察及<br>机制研究<br>responsible<br>unit: Efficacy<br>observation<br>and<br>mechanism<br>study on the<br>treatment of<br>acute herpes<br>zoster with<br>Zanci of fire<br>needle. | 郭太品<br>Taipin Guo | 昆明医科大学<br>第六附属医院<br>the sixth<br>affiliated<br>hospital of<br>kunming<br>medical<br>university | 10                                                   |
| .....               | .....                                                                                                                                                                                                   | .....             | .....                                                                                          | .....                                                |
