# Supplementary material for: Fire needle plus cupping for acute herpes zoster: study protocol for a randomized controlled trial
Source: PubMed Central journal article supplement (PMC7409425; doi:10.1186/s13063-020-04599-2), 2020-08-06
Supplement: 13063_2020_4599_MOESM3_ESM.pdf [file 13063_2020_4599_MOESM3_ESM.pdf]

云南省科学技术厅-云南中医学院应用基础研究联合专项资金 2017 年推荐立项项目公示  
 Yunnan provincial department of science and technology - Yunnan university of traditional Chinese medicine applied fundamental research joint special fund recommended for approval in 2017

2017 年云南省科学技术厅-云南中医学院应用基础研究联合专项资金推荐拟立项项目名单  
 Recommend the list of proposed projects of Yunnan provincial department of science and technology - Yunnan university of traditional Chinese applied basic research joint special fund in 2017

| 序号<br>serial number | 项目名称<br>project name                                                                                                                                                                                  | 申报人<br>declarant  | 所在单位<br>Relying on<br>universities                          | 资助经费（万元）<br>Funding amount<br>(RMB:<br>ten thousand ) |
|---------------------|-------------------------------------------------------------------------------------------------------------------------------------------------------------------------------------------------------|-------------------|-------------------------------------------------------------|-------------------------------------------------------|
| .....               | .....                                                                                                                                                                                                 | .....             | .....                                                       | .....                                                 |
| 2                   | 基于多模态技术的俞募埋线对胃热-脾虚型腹型肥胖的中枢网络双向调节机制研究 Two-way regulation central mechanism network of shu-muacupoint embedding line for gastro-spleen deficiency type abdominal obesity based on multimodal technology | 郭太品<br>Taipin Guo | 云南中医学院<br>Yunnan university of traditional Chinese medicine | 10                                                    |
| .....               | .....                                                                                                                                                                                                 | .....             | .....                                                       | .....                                                 |
