# Supplementary material for: Fire needle plus cupping for acute herpes zoster: study protocol for a randomized controlled trial
Source: PubMed Central journal article supplement (PMC7409425; doi:10.1186/s13063-020-04599-2), 2020-08-06
Supplement: 13063_2020_4599_MOESM4_ESM.pdf [file 13063_2020_4599_MOESM4_ESM.pdf]

## Informed Consent

Dear patient:

We will invite you to participate in the clinical research of "the Observation of Curative Effect and Mechanism Research on the Treatment of Acute Herpes Zoster by Fire Needle Cupping". Before you decide whether to participate in the study, please read the following carefully as much as possible. It can help you understand the details of the study. If there is still something unclear, please consult your doctor, who will answer your questions.

1. The fire needle cupping method combines the advantages and features of traditional acupuncture methods, such as fire needle therapy, blood pricking therapy, cupping therapy and Zan needling. It is a traditional Chinese medicine treatment of herpes zoster.
2. This study is a randomized clinical control study. You may be divided into a control group or a treatment group. The treatment group is treated with fire needle cupping at the site of herpes and the corresponding segment Jiaji point for 1-7 times. The control group was treated with famciclovir hydrochloride plus gabapentin or fire needle cupping plus famciclovir hydrochloride (famciclovir 3 × 0.25g/d P.O., individual dose of 900-3600mg / d. P.O);
3. In case of discomfort to you during the treatment, such as scald, you can report to us at any time and get timely and reasonable treatment; in case of damage related to clinical research, the subject can get appropriate compensation.
4. During the study, you will receive a series of tests, and the content and specific steps of each test will be explained and guided by your doctor. The examination items are as follows: blood routine, urine routine, liver and kidney function, electrocardiogram, chest X-ray examination. Before and after treatment, you will have the determination of substance P and  $\beta$  - endorphin. All of the above tests are safe and will not have adverse effects on your health and condition.
5. Your participation is entirely voluntary. If you are not willing to participate, your treatment will not be affected in any way. At any stage of the clinical research, you have the right to withdraw from the clinical research at any time without any discrimination or retaliation, and your medical treatment and rights will not be affected.
6. If you agree to participate in the study, we sincerely hope that you can cooperate with us to complete the study without special reasons. However, in the course of the study, whether you agree or not, the doctor has the right to suspend you from participating in the study at any time for your benefit.

I have read the above contents in detail or others have read them to me. I have understood the purpose, process and duration of this study, possible benefits, possible risks and inconveniences. Through my independent and full consideration and detailed explanation of the doctor, all questions have been satisfactorily answered. After fully understanding all the contents of the instructions and the advantages and disadvantages of participating in the study, I will voluntarily participate in the study. I will comply with the requirements of the study plan, and I am willing to solve any problems through friendly consultation with researchers, and seriously complete the study.

Signature of patient:

Signature of family: (relationship)

Date:

Signature of doctor:

Date:
